# Supplementary material for: Intraoperative Techniques That Define the Mucosal Margins of Oral Cancer In-Vivo: A Systematic Review
Source: MDPI journal article supplement (doi:10.3390/cancers16061148), 2024-03-14
Supplement: s1 [file s1]

**Supplementary: PubMed search term:** (((("oral cavity"[Title/Abstract] OR "gingiva"[Title/Abstract] OR "tongue"[Title/Abstract] OR "floor of mouth"[Title/Abstract] OR "head and neck"[Title/Abstract] OR "head neck"[Title/Abstract] OR "buccal"[Title/Abstract] OR "oral mucosa"[Title/Abstract] OR "oral\*" [Title/Abstract] OR "gum"[Title/Abstract] OR "retromolar"[Title/Abstract] OR "alveolar"[Title/Abstract] OR "cheek"[Title/Abstract] OR "maxilla\*" [Title/Abstract] OR "mandib\*" [Title/Abstract] OR "jaw"[Title/Abstract]) AND ("cancer"[Title/Abstract] OR "cancers"[Title/Abstract] OR "carcinoma"[Title/Abstract] OR "carcinomas"[Title/Abstract] OR "tumor"[Title/Abstract] OR "tumour"[Title/Abstract] OR "tumors"[Title/Abstract] OR "tumours"[Title/Abstract] OR "malignan\*" [Title/Abstract] OR "squamous cell carcinom\*" [Title/Abstract])) OR ("oral cancer\*" [Title/Abstract] OR "OSCC"[Title/Abstract] OR "oral squamous cell carcinom\*" [Title/Abstract] OR "HNSCC"[Title/Abstract] OR "oral carcinoma"[Title/Abstract] OR "oral cancers"[Title/Abstract] OR "oral carcinomas"[Title/Abstract] OR "oral malignan\*" [Title/Abstract] OR "oral tumor"[Title/Abstract] OR "oral tumors"[Title/Abstract] OR "oral tumours"[Title/Abstract] OR "oral tumour"[Title/Abstract] OR "oral tumor\*" [Title/Abstract] OR "oral tumors"[Title/Abstract]) OR "mouth neoplasms"[MeSH Terms]) AND ("border\*" [Title/Abstract] OR "margin\*" [Title/Abstract] OR "tumor free resection\*" [Title/Abstract] OR "margins of excision"[MeSH Terms] OR "thickness"[Title/Abstract] OR "depth of invasion"[Title/Abstract] OR "DOI"[Title/Abstract])) AND (2010:2023[pdat]). **Embase search term:** (('oral cavity':ti,ab,kw OR 'gingiva\*':ti,ab,kw OR 'tongue':ti,ab,kw OR 'floor of mouth':ti,ab,kw OR 'head and neck':ti,ab,kw OR 'head neck':ti,ab,kw OR 'buccal':ti,ab,kw OR 'oral mucosa\*':ti,ab,kw OR 'gum':ti,ab,kw OR 'retromolar':ti,ab,kw OR 'alveolar':ti,ab,kw OR 'cheek':ti,ab,kw OR 'maxill\*':ti,ab,kw OR 'mandib\*':ti,ab,kw OR 'jaw':ti,ab,kw) AND ('cancer':ti,ab,kw OR 'cancers':ti,ab,kw OR 'carcinoma':ti,ab,kw OR 'carcinomas':ti,ab,kw OR 'tumor':ti,ab,kw OR 'tumour':ti,ab,kw OR 'tumors':ti,ab,kw OR 'tumours':ti,ab,kw OR 'malignan\*':ti,ab,kw OR 'squamous cell carcinoma\*':ti,ab,kw) OR 'oral cancer':ti,ab,kw OR 'oscc':ti,ab,kw OR 'oral squamous cell carcinoma':ti,ab,kw OR 'hnscc':ti,ab,kw OR 'oral carcinoma':ti,ab,kw OR 'oral cancers':ti,ab,kw OR 'oral carcinomas':ti,ab,kw OR 'oral malignan\*':ti,ab,kw OR 'oral tumors':ti,ab,kw OR 'oral tumours':ti,ab,kw OR 'oral tumour':ti,ab,kw OR 'oral tumor\*':ti,ab,kw OR 'mouth cancer'/exp OR 'tongue cancer'/exp) AND ('border\*':ti,ab,kw OR 'margin\*':ti,ab,kw OR 'tumor free resection\*':ti,ab,kw OR 'surgical margin'/exp OR 'thickness'/exp OR 'depth of invasion'/exp) AND [2010-2023]/py.
